# Supplementary material for: Superior Valorisation of Juglans regia L. Leaves of Different Maturity through the Isolation of Bioactive Compounds
Source: MDPI journal article supplement (doi:10.3390/molecules28217328), 2023-10-29
Supplement: s1 [file s1]

## FIGURES

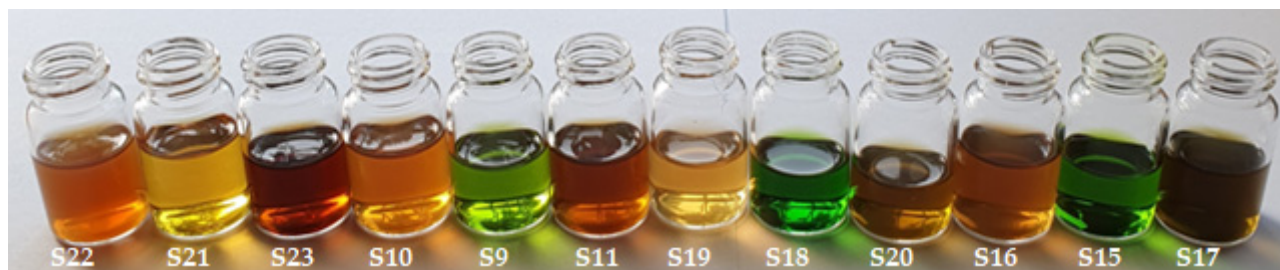

Figure S1 - Different extracts of *Juglans regia* L (color variation).

S22 - YL extraction with water; S21- YL extraction with ethanol; S23 - YL extraction with hydroethanolic mixture; S10 - MGL extraction with water; S9 - MGL extraction with ethanol; S11 - MGL extraction with hydroethanolic mixture; S19 - LG extraction with water; S19 - extraction with ethanol; S18 - extraction with hydroethanolic mixture; S16 - YGL extraction with water; S15 - YGL extraction with ethanol; S17 - YGL extraction with hydroethanolic mixture. All samples were subjected ultrasound assisted-extraction for 60 min

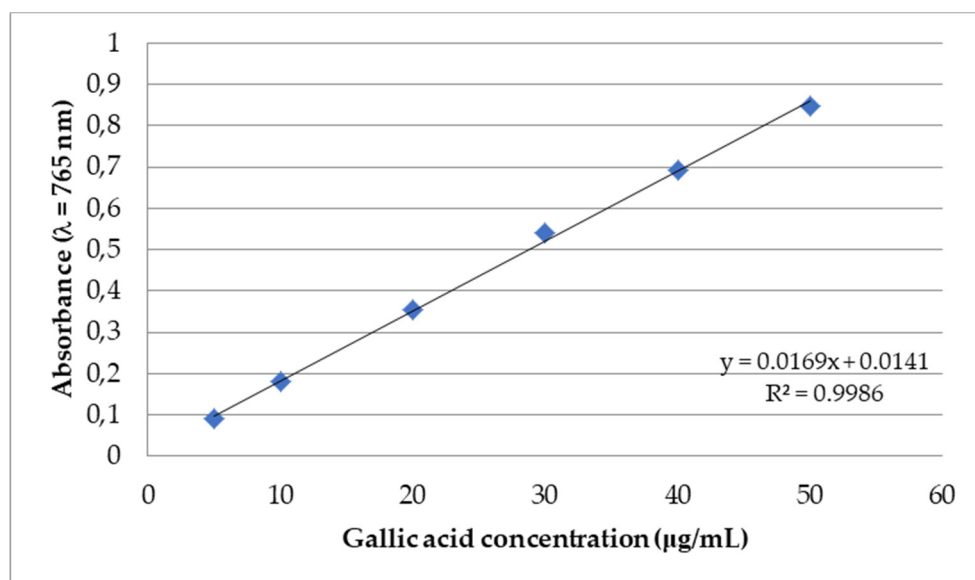

Figure S2 - Standard curve of gallic acid for total polyphenol content assay (TPC).

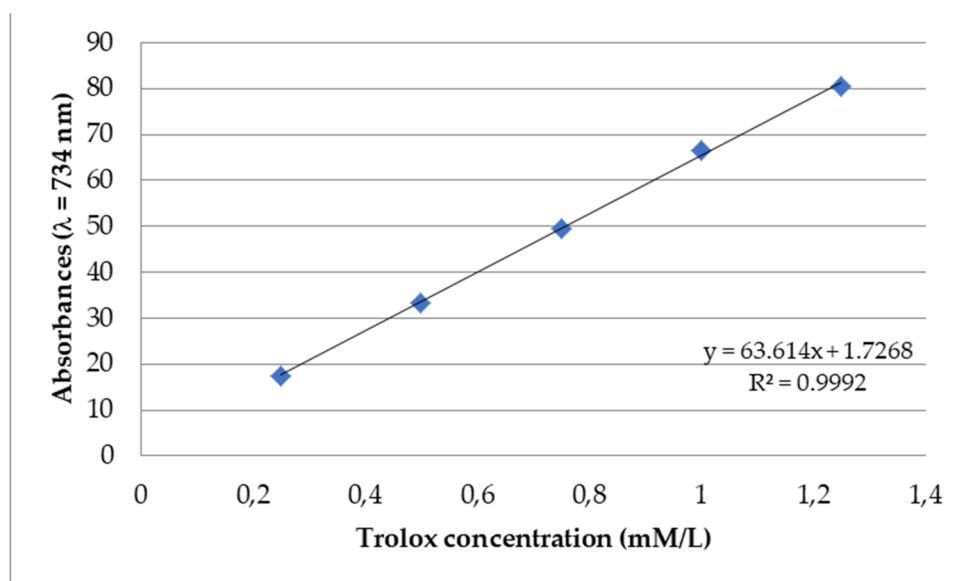

Figure S3 - Standard curve of Trolox for Trolox equivalent antioxidants capacity assay (TEAC).

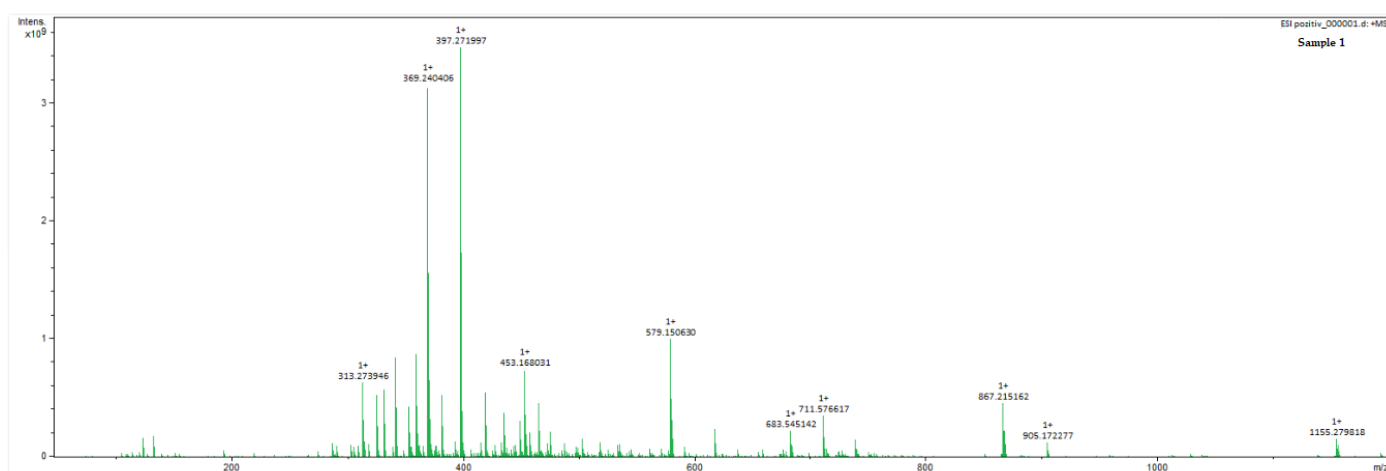

Figure S4\_1 FT-ICR-MS spectrum of MGL - extraction by magnetic stirring with hydroethanolic mixture - 1 min.

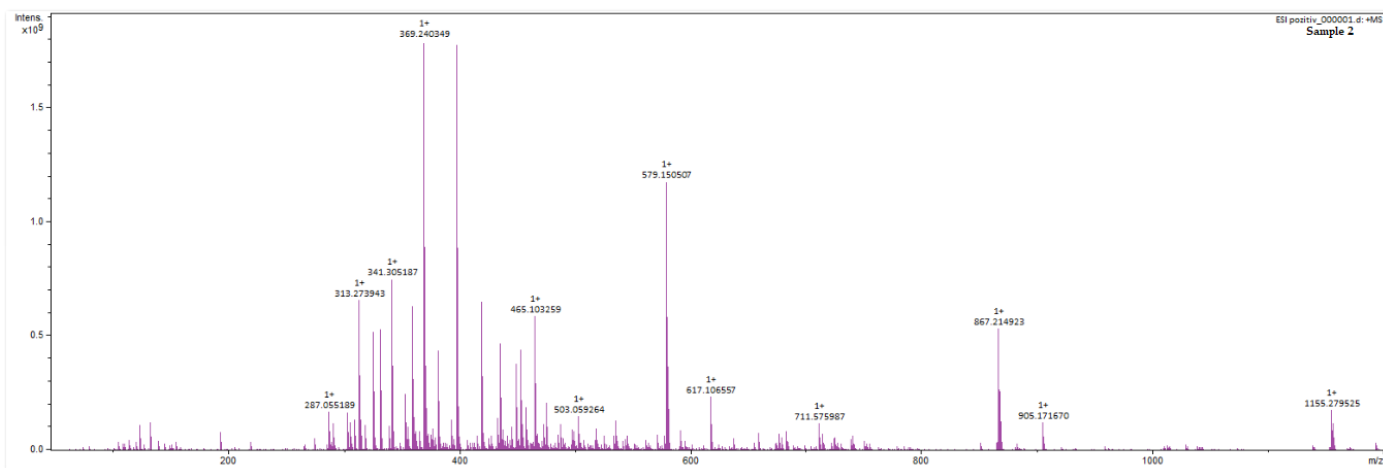

Figure S4\_2 FT-ICR-MS spectrum of MGL - extraction by magnetic stirring with hydroethanolic mixture - 10 min.

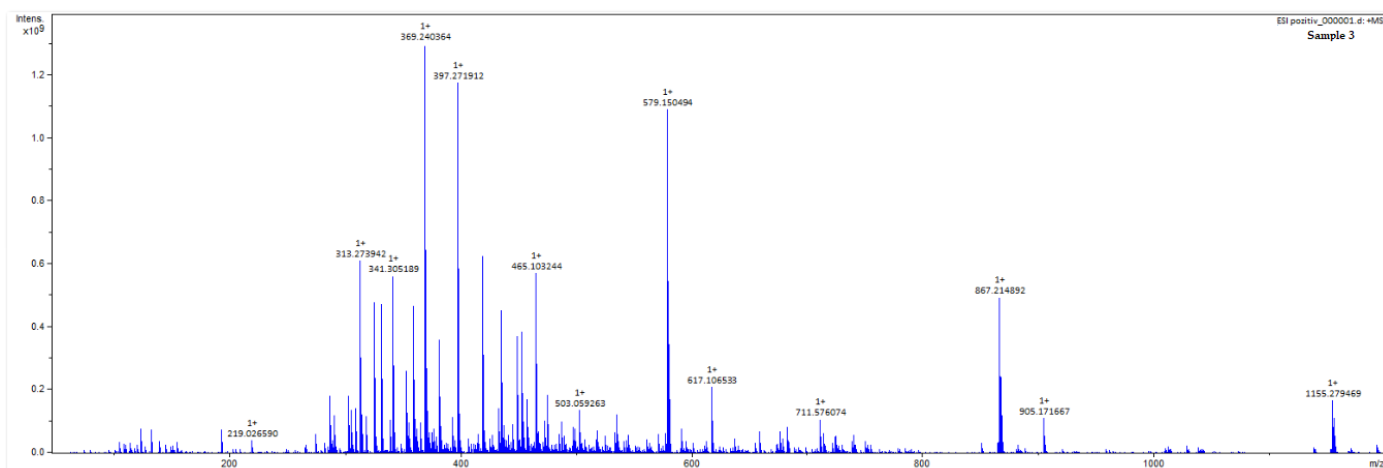

Figure S4\_3 FT-ICR-MS spectrum of MGL - extraction by magnetic stirring with hydroethanolic mixture - 20 min.

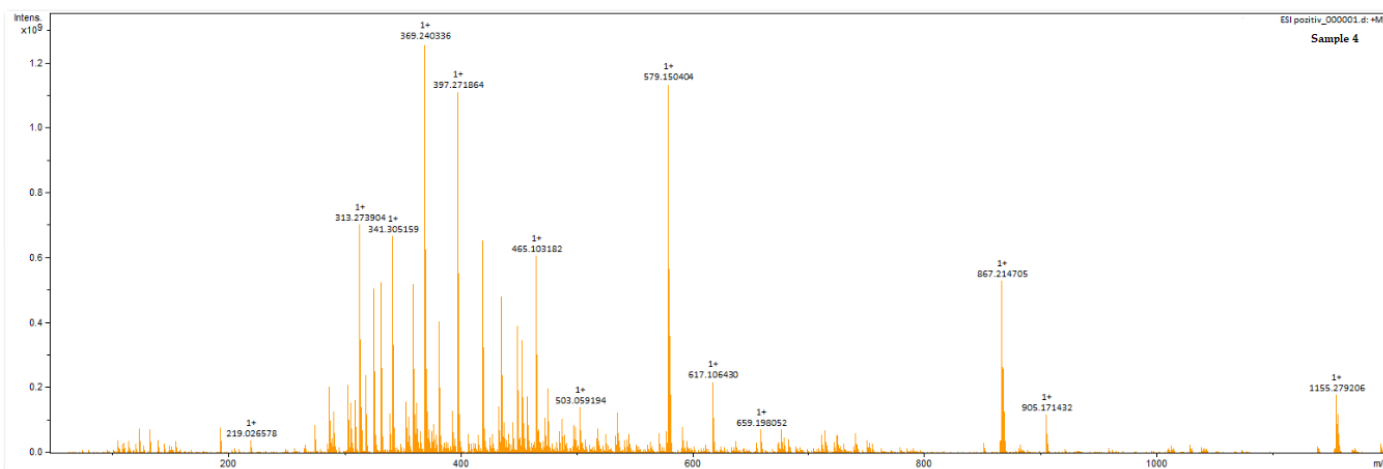

Figure S4\_4 FT-ICR-MS spectrum of MGL - extraction by magnetic stirring with hydroethanolic mixture - 30 min.

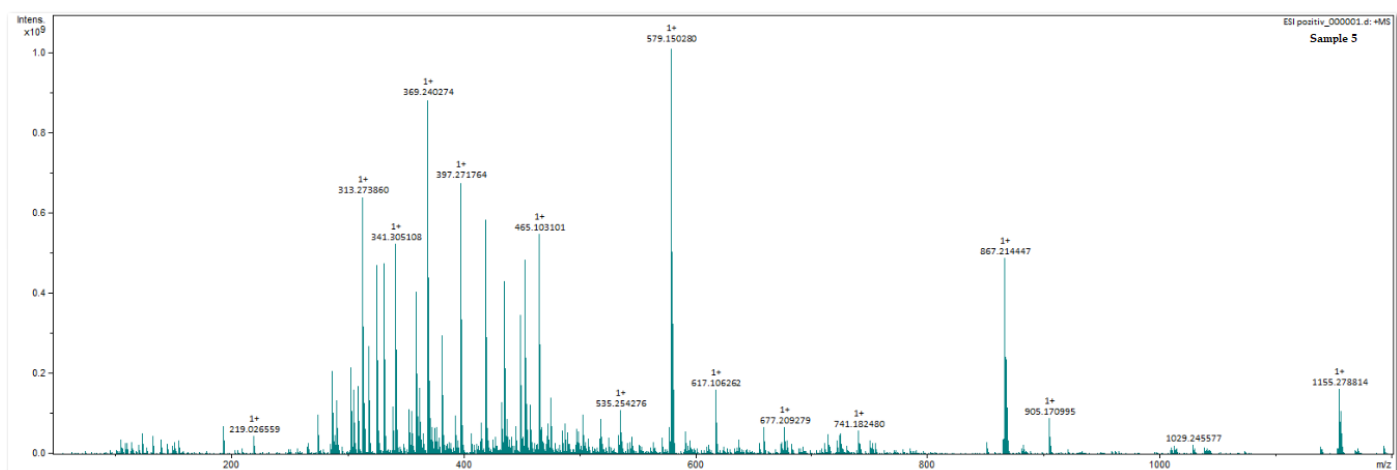

Figure S4\_5 FT-ICR-MS spectrum of MGL - extraction by magnetic stirring with hydroethanolic mixture - 45 min.

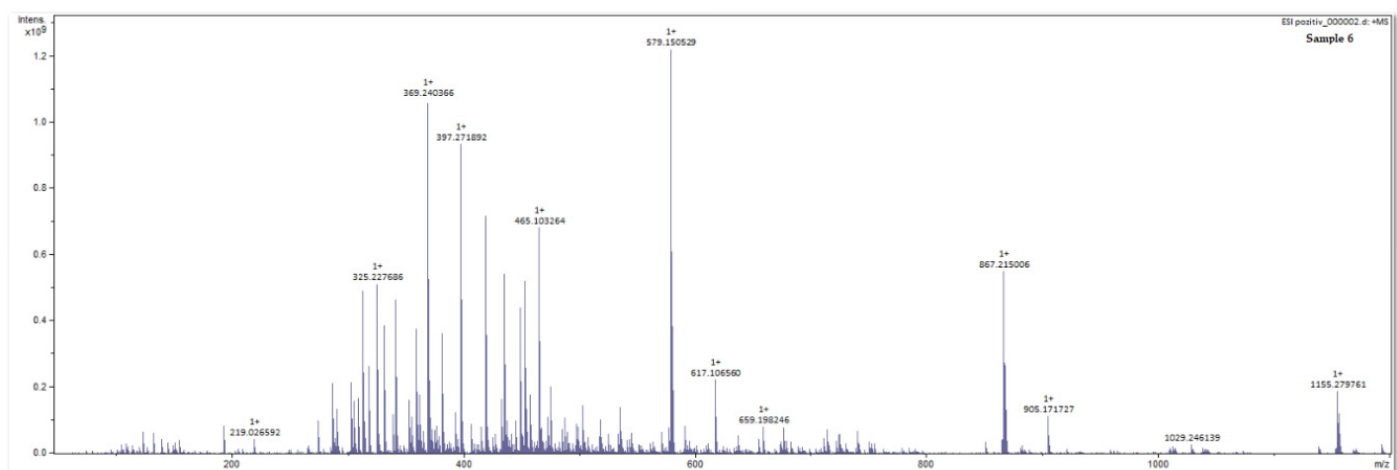

Figure S4\_6 FT-ICR-MS spectrum of MGL - extraction by magnetic stirring with hydroethanolic mixture - 60 min.

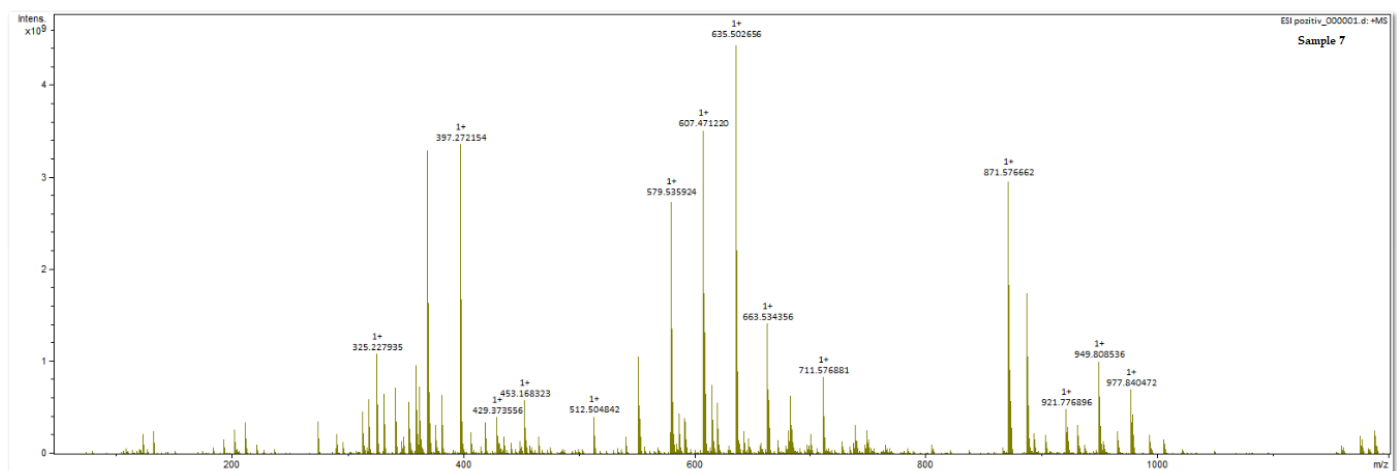

Figure S4\_7 FT-ICR-MS spectrum of MGL - extraction by magnetic stirring with ethanol - 60 min.

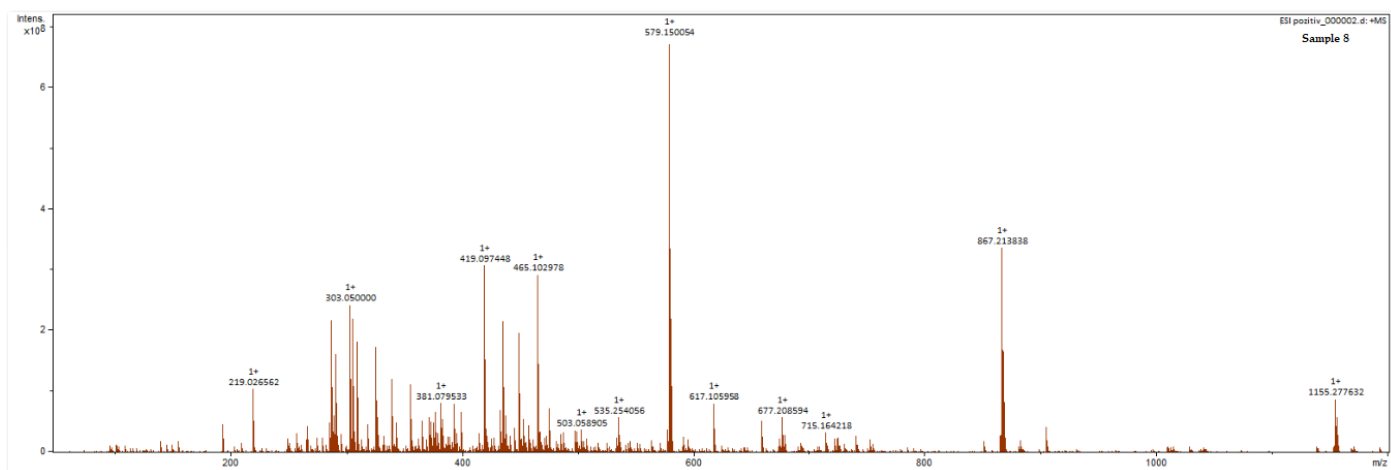

Figure S4\_8 FT-ICR-MS spectrum of MGL - extraction by magnetic stirring with water - 60 min.

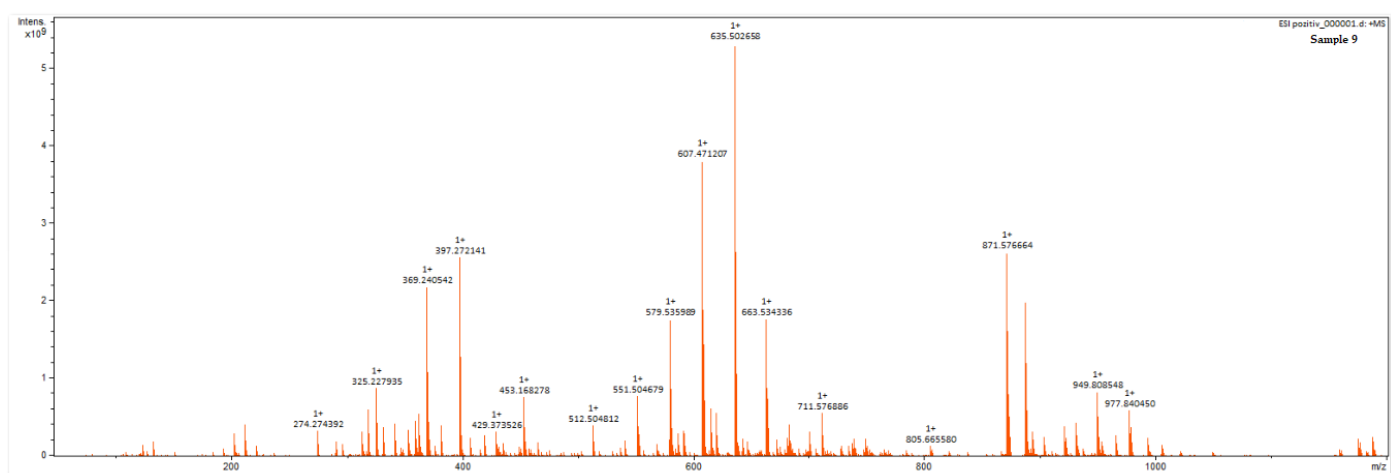

Figure S4\_9 FT-ICR-MS spectrum of MGL - ultrasound assisted-extraction with ethanol - 60 min.

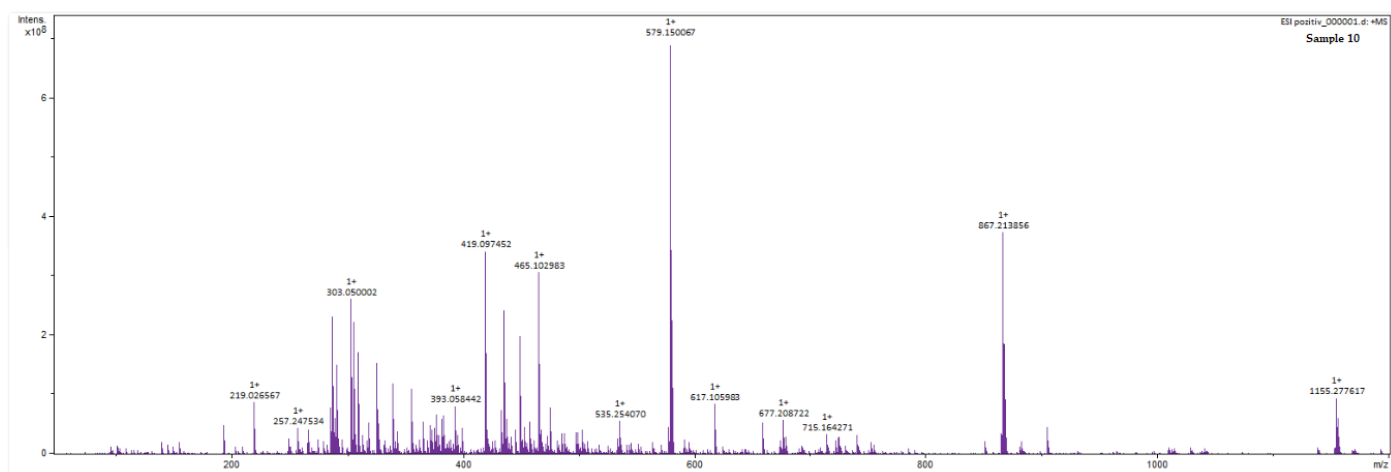

Figure S4\_10 FT-ICR-MS spectrum of MGL - ultrasound assisted-extraction with water - 60 min.

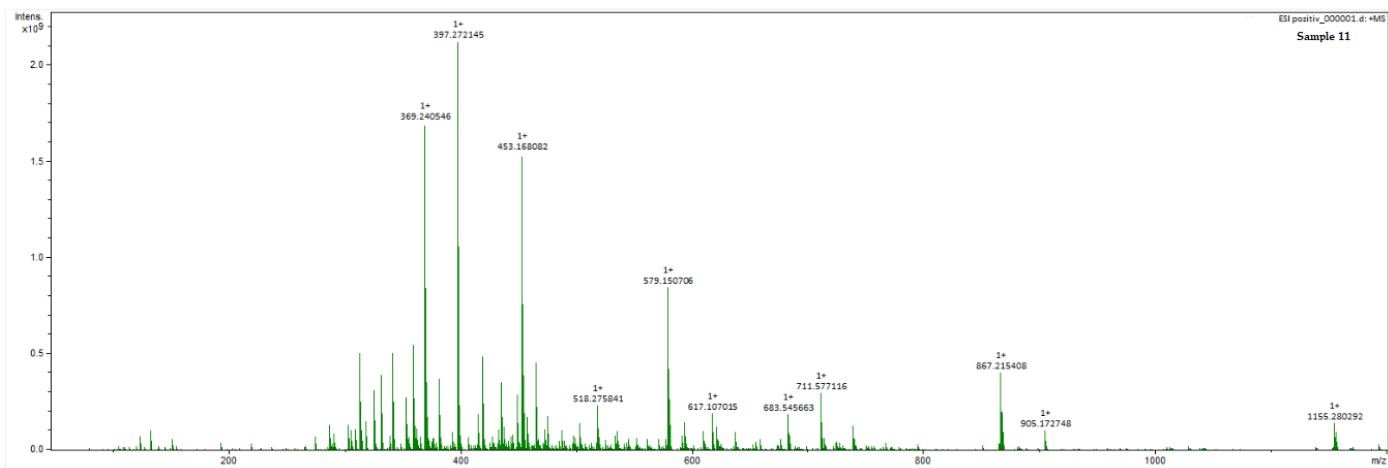

Figure S4\_11 FT-ICR-MS spectrum of MGL - ultrasound assisted-extraction with hydroethanolic mixture - 60 min.

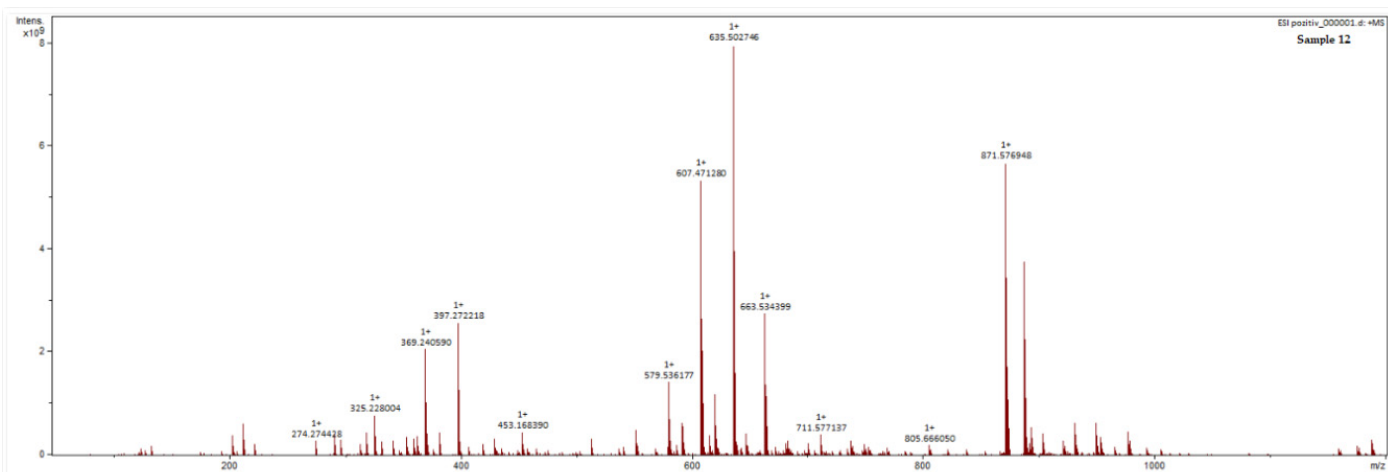

Figure S4\_12 FT-ICR-MS spectrum of MGL - extraction by maceration with ethanol - 60 min.

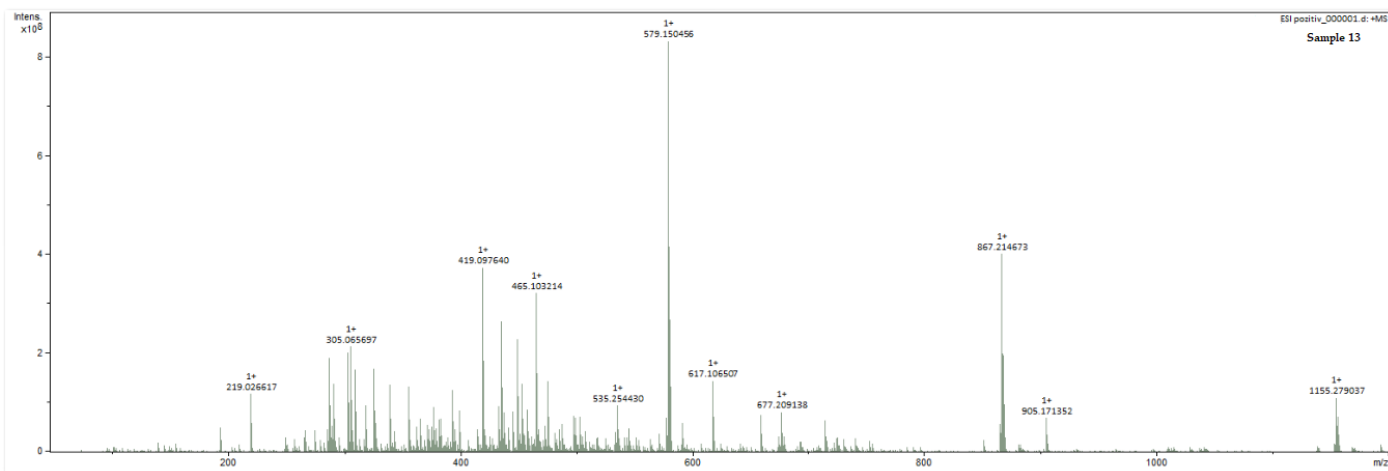

Figure S4\_13 FT-ICR-MS spectrum of MGL - extraction by maceration with water - 60 min.

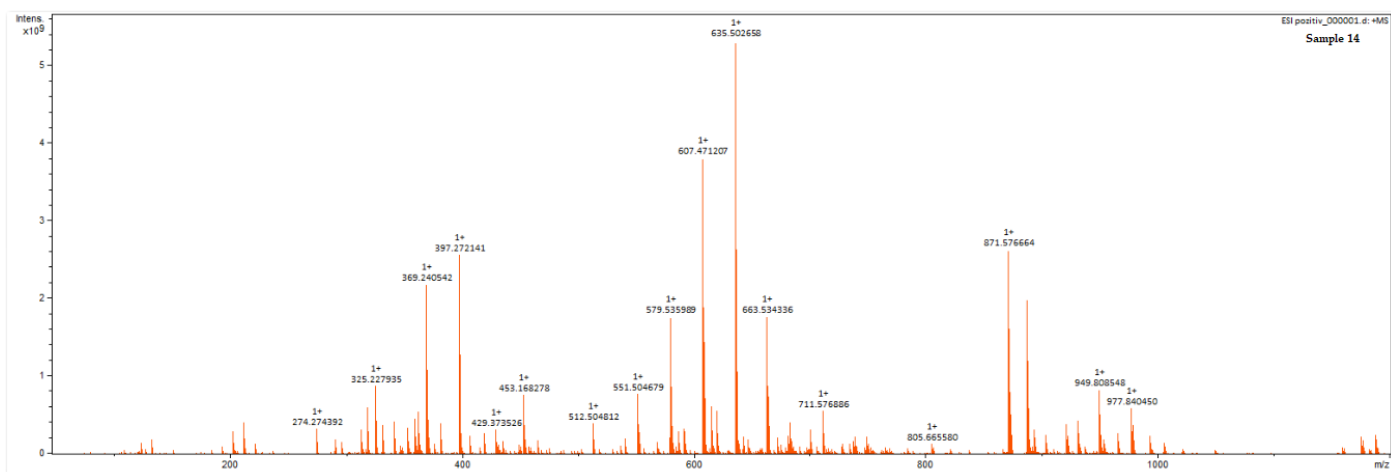

Figure S4\_14 FT-ICR-MS spectrum of MGL - extraction by maceration with hydroethanolic mixture - 60 min.

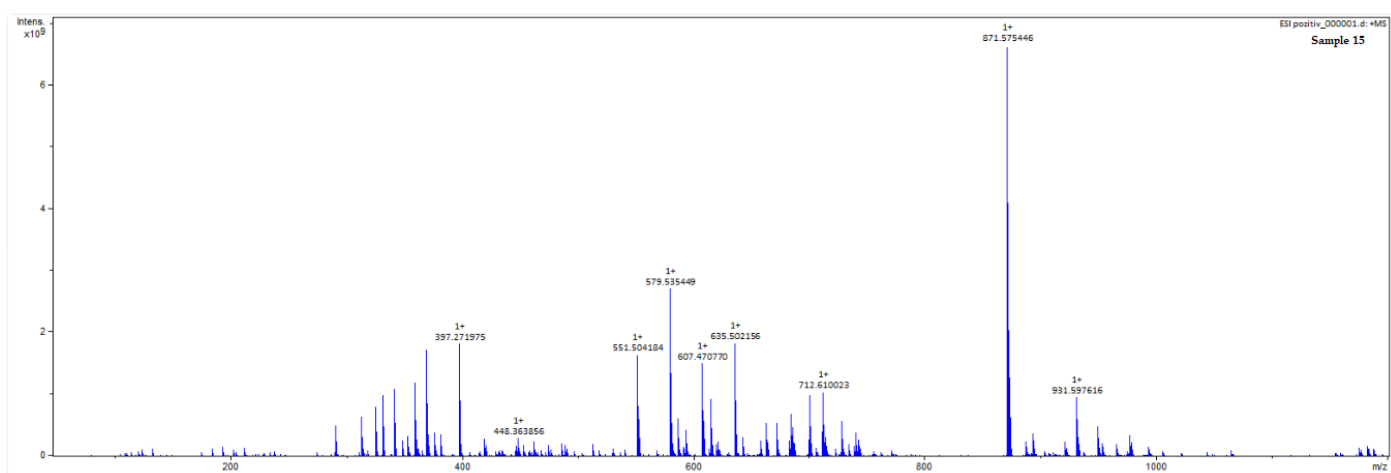

Figure S4\_15 FT-ICR-MS spectrum of YGL - ultrasound assisted-extraction with ethanol - 60 min.

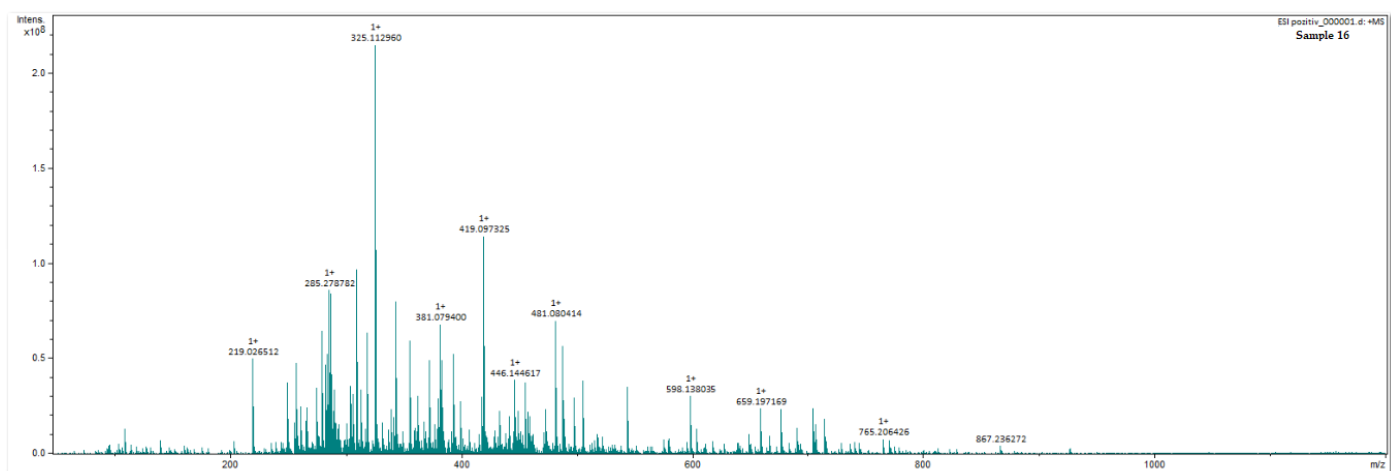

Figure S4\_16 FT-ICR-MS spectrum of YGL - ultrasound assisted-extraction with water - 60 min.

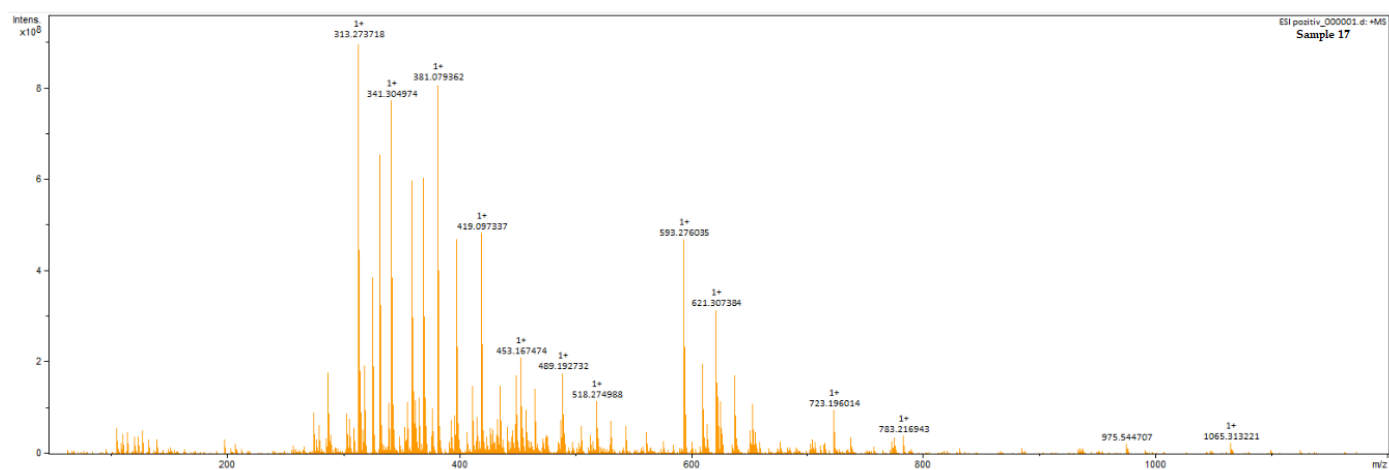

Figure S4\_17 FT-ICR-MS spectrum of YGL - ultrasound assisted-extraction with hydroethanolic mixture - 60 min.

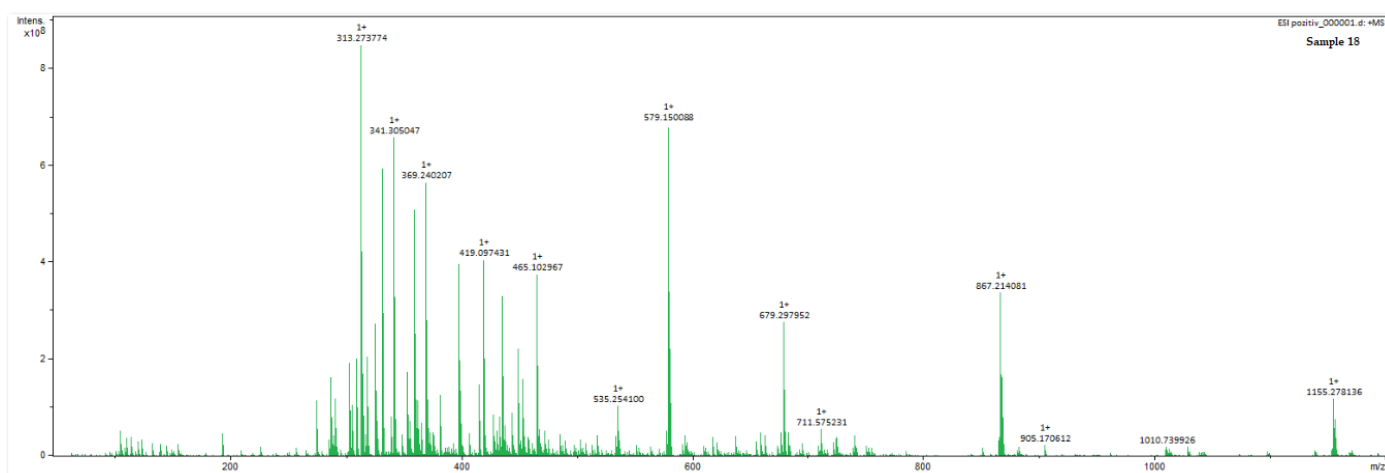

Figure S4\_18 FT-ICR-MS spectrum of GL - ultrasound assisted-extraction with ethanol - 60 min.

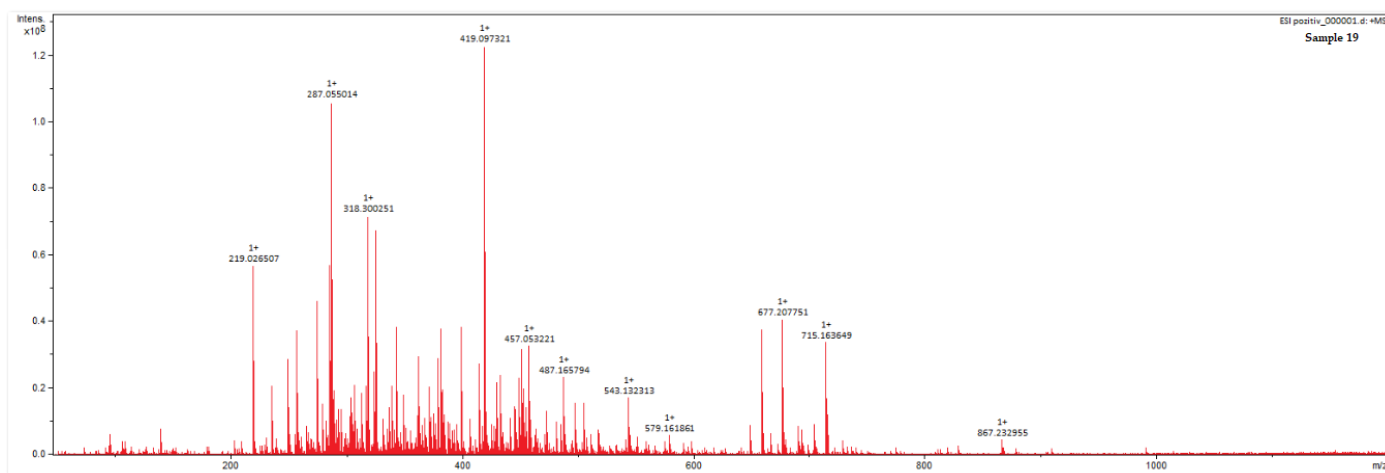

Figure S4\_19 FT-ICR-MS spectrum of GL - ultrasound assisted-extraction with water - 60 min.



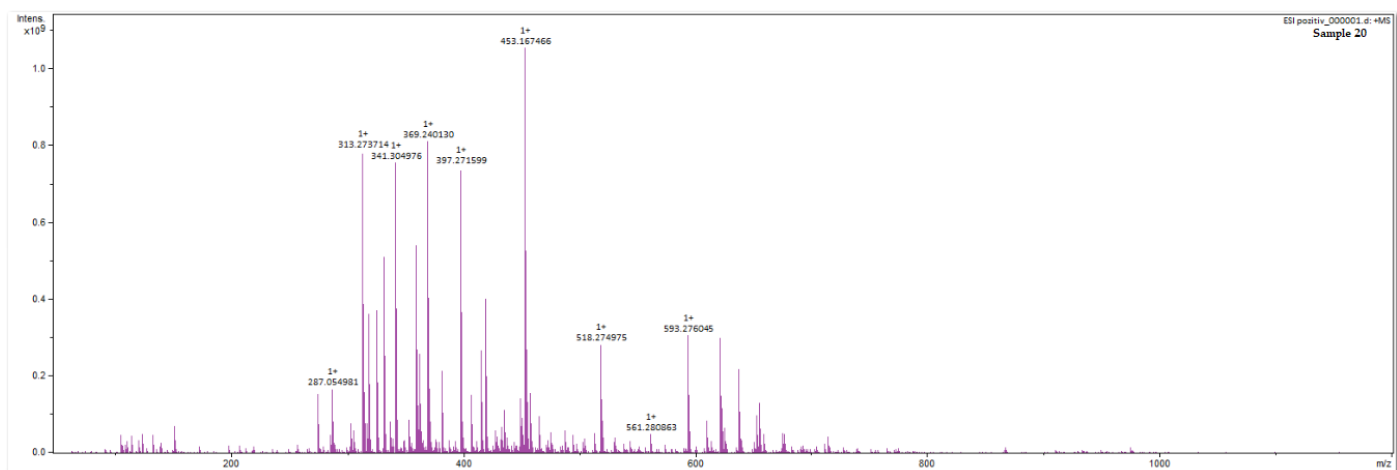

Figure S4\_20 FT-ICR-MS spectrum of GL - ultrasound assisted-extraction with hydroethanolic mixture - 60 min.

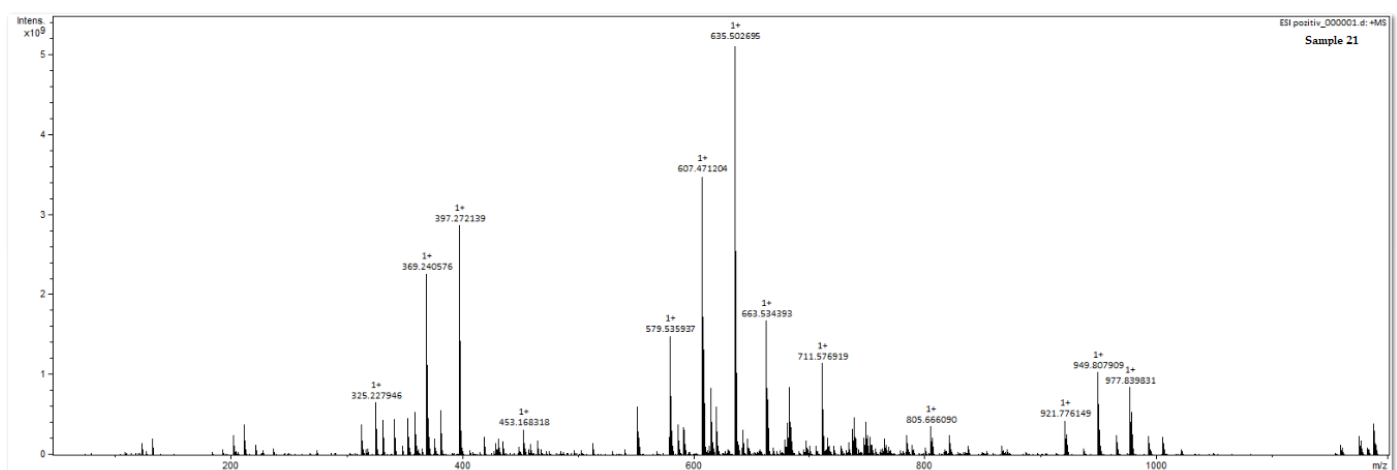

Figure S4\_21 FT-ICR-MS spectrum of YL - ultrasound assisted- extraction with ethanol - 60 min.

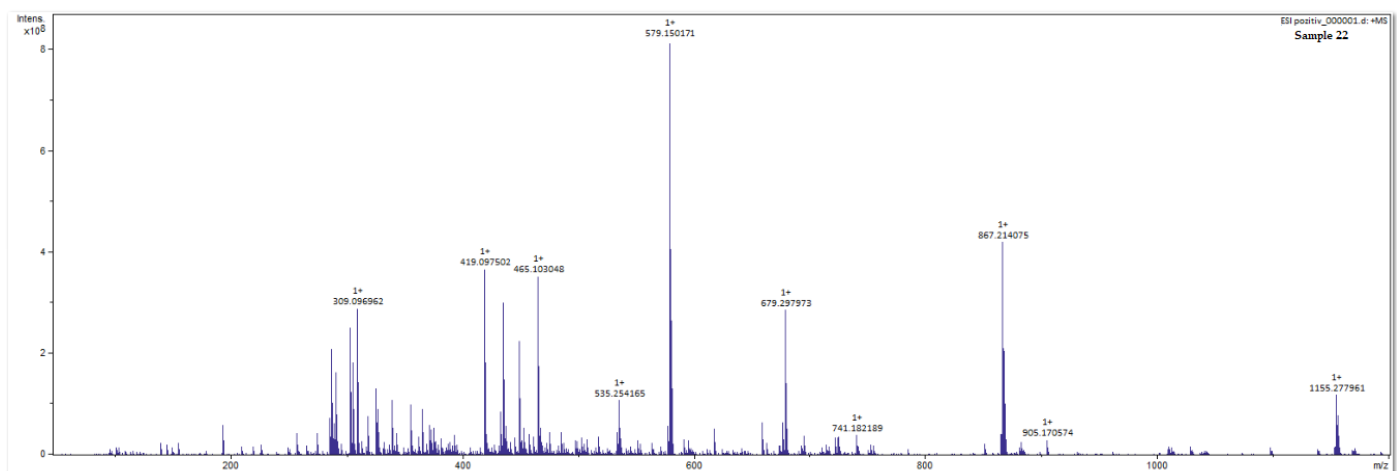

Figure S4\_22 FT-ICR-MS spectrum of YL - ultrasound assisted-extraction with water - 60 min.

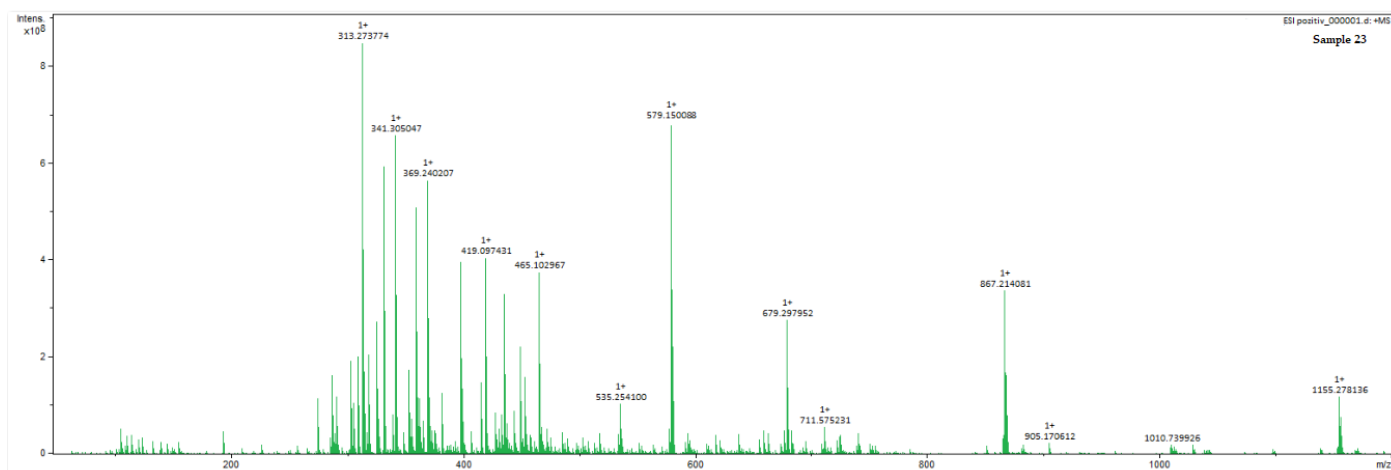

Figure S4\_23 FT-ICR-MS spectrum of YL - ultrasound assisted-extraction with hydroethanolic mixture - 60 min.

## TABLES

Table S1. Biological activities of the main compounds identified in the walnut leaf's extracts by means of FT-ICR-MS method.

| Compound Class | Compound                   | Chemical formula                                                 | Biological activity [6,34,39,47-60]                                                          |
|----------------|----------------------------|------------------------------------------------------------------|----------------------------------------------------------------------------------------------|
| Phenolic       | Caffeic acid               | C <sub>9</sub> H <sub>8</sub> O <sub>4</sub>                     | Antioxidant, anti-inflammatory and anti-carcinogenic activity                                |
|                | Caftaric acid              | C <sub>13</sub> H <sub>12</sub> O <sub>9</sub>                   | Antioxidant, antidiabetic, anti-inflammatory, anticarcinogenic, antiobesity                  |
|                | Chlorogenic acid           | C <sub>16</sub> H <sub>18</sub> O <sub>9</sub>                   | Antioxidant, lower blood pressure                                                            |
|                | Ellagic acid               | C <sub>14</sub> H <sub>6</sub> O <sub>8</sub>                    | Cytotoxic, anti-proliferative                                                                |
|                | Ferulic acid               | C <sub>10</sub> H <sub>10</sub> O <sub>4</sub>                   | Anticancerous                                                                                |
|                | Juglone                    | C <sub>10</sub> H <sub>6</sub> O <sub>3</sub>                    | Antibacterial, antiviral, anticancer, antioxidant                                            |
|                | p-coumaric acid            | C <sub>9</sub> H <sub>8</sub> O <sub>3</sub>                     | Antioxidant                                                                                  |
|                | Sinapate                   | C <sub>11</sub> H <sub>12</sub> O <sub>5</sub>                   | Antioxidant, antimicrobial                                                                   |
|                | 3-p-coumaroylquinic acid   | C <sub>16</sub> H <sub>18</sub> O <sub>8</sub>                   | Antibacterial                                                                                |
|                | Quercetin 3-o-arabinoside  | C <sub>20</sub> H <sub>18</sub> O <sub>11</sub>                  | Antioxidant, anti-inflammatory                                                               |
|                | Quercetin 3-rhamnoside     | C <sub>21</sub> H <sub>20</sub> O <sub>11</sub>                  | Antioxidant, anti-inflammatory, anti-cancer and lipid peroxidation inhibitory activities     |
|                | Quercetin 3-o-pentoside    | C <sub>25</sub> H <sub>26</sub> O <sub>15</sub>                  | Antioxidant                                                                                  |
| Flavonoid      | Quercetin                  | C <sub>15</sub> H <sub>10</sub> O <sub>7</sub>                   | Analgesic, antibacterial, antiviral                                                          |
|                | Myricetin                  | C <sub>15</sub> H <sub>10</sub> O <sub>8</sub>                   | Anticancer, antidiabetic, antibacterial, antiviral                                           |
|                | Kaempferol                 | C <sub>15</sub> H <sub>10</sub> O <sub>6</sub>                   | Acute and chronic inflammation                                                               |
|                | Kaempferol 3-o-arabinoside | C <sub>20</sub> H <sub>18</sub> O <sub>10</sub>                  | Antioxidant                                                                                  |
|                | Kaempferol-3-o-rhamnoside  | C <sub>21</sub> H <sub>20</sub> O <sub>10</sub>                  | Antioxidant, anti-tumor                                                                      |
|                | Isokaempferide             | C <sub>16</sub> H <sub>12</sub> O <sub>6</sub>                   | Hepatoprotective, antimicrobial, anti-proliferative effect                                   |
|                | Catechin hydrate           | C <sub>15</sub> H <sub>14</sub> O <sub>6</sub> +H <sub>2</sub> O | Antioxidant, anticancer                                                                      |
|                | Hyperoside                 | C <sub>21</sub> H <sub>20</sub> O <sub>12</sub>                  | Anti-inflammatory, anti-oxidant stress, anti-swelling, anti-bacterial and anti-viral effects |
| Flavone        | Luteolin                   | C <sub>15</sub> H <sub>10</sub> O <sub>6</sub>                   | Anticancer, anti-inflammatory                                                                |
| Flavanone      | Naringenin                 | C <sub>15</sub> H <sub>12</sub> O <sub>5</sub>                   | Antiviral, antibacterial, antioxidant                                                        |

|                 |                               |                                                             |                                                                             |
|-----------------|-------------------------------|-------------------------------------------------------------|-----------------------------------------------------------------------------|
| Flavonone       | Hesperetin                    | C <sub>21</sub> H <sub>20</sub> O <sub>12</sub>             | Scavenging activity and cardioprotective activity                           |
| Flavanol        | Catechin                      | C <sub>15</sub> H <sub>14</sub> O <sub>6</sub>              | Antioxidant, anti-inflammatory                                              |
|                 | Epigallocatechin              | C <sub>15</sub> H <sub>14</sub> O <sub>7</sub>              | Antioxidant, antitumor                                                      |
|                 | Epigallocatechin gallate      | C <sub>22</sub> H <sub>18</sub> O <sub>11</sub>             | Reduce inflammation, aid weight loss, help prevent heart and brain disease  |
|                 | Fisetinidol                   | C <sub>15</sub> H <sub>14</sub> O <sub>5</sub>              | Antioxidant, antibacterial                                                  |
| Tereponoid      | Guibourtinidol                | C <sub>15</sub> H <sub>14</sub> O <sub>4</sub>              | Antioxidant, prevent HIV-1                                                  |
|                 | Oleanic acid                  | C <sub>30</sub> H <sub>48</sub> O <sub>3</sub>              | Dyslipidemia, diabetes, and metabolic syndrome                              |
| Steroid         | Stigmasterol                  | C <sub>29</sub> H <sub>48</sub> O                           | Anticancerous, dyslipidemia, diabetes, and metabolic syndrome               |
| Vitamin         | Resveratrol                   | C <sub>14</sub> H <sub>12</sub> O <sub>3</sub>              | Anti-inflammatory, anti-oxidant and anti-carcinogenic effects               |
|                 | Myo-inositol                  | C <sub>6</sub> H <sub>12</sub> O <sub>6</sub>               | Prevent and improve insulin resistance                                      |
|                 | Taxifolin                     | C <sub>15</sub> H <sub>12</sub> O <sub>7</sub>              | Antioxidant, support immune, respiratory, skin and cellular health benefits |
| Anthocyanidin   | Pelargonidin                  | C <sub>15</sub> H <sub>11</sub> O <sub>5</sub> <sup>+</sup> | Antioxidant                                                                 |
|                 | Malvidin                      | C <sub>17</sub> H <sub>15</sub> O <sub>7</sub> <sup>+</sup> | Antioxidant, anti-inflammatory                                              |
|                 | Cyanidin 3-glucoside chloride | C <sub>21</sub> H <sub>21</sub> ClO <sub>11</sub>           | Antioxidant, anti-inflammatory, anti-ischemic, anti-cancer                  |
| Other compounds | Quinic acid                   | C <sub>7</sub> H <sub>12</sub> O <sub>6</sub>               | Radioprotection, anti-neuroinflammatory, antioxidant                        |
|                 | Citric acid                   | C <sub>6</sub> H <sub>8</sub> O <sub>7</sub>                | Antibacterial, antioxidant, anti-inflammatory                               |
|                 | Azelaic acid                  | C <sub>9</sub> H <sub>16</sub> O <sub>4</sub>               | Anti-inflammatory, antioxidant                                              |
|                 | Asiatic acid                  | C <sub>30</sub> H <sub>48</sub> O <sub>5</sub>              | Antioxidant, anti-aging                                                     |
